# Supplementary material for: A reflux system for SBA-15 synthesis for the selective hydrogenation of cinnamyl aldehyde
Source: Royal Society of Chemistry journal article supplement (doi:10.1039/d3nj01680c), 2023-01-01
Supplement: d3nj01680c1.pdf [file d3nj01680c1.pdf]

## SUPPLEMENTARY INFORMATION

### A reflux system to SBA-15 synthesis for selective hydrogenation of cinnamyl aldehyde

Guofeng Wang, Wenwen Gao, Dong Yun \*, Chuanzhi Xu \*, Zhen Li \*, Chungu Xia

State Key Laboratory for Oxo Synthesis and Selective Oxidation, Lanzhou Institute of Chemical Physics (LICP), Chinese Academy of Sciences, Lanzhou 730000, P.R. China

#### **\*Corresponding authors**

*Email addresses:* [yund@licp.cas.cn](mailto:yund@licp.cas.cn) (D. Yun),

[xucz@licp.cas.cn](mailto:xucz@licp.cas.cn) (C.Z. Xu),

[zhenli@licp.cas.cn](mailto:zhenli@licp.cas.cn) (Z. Li).

## 1. Synthesis of SBA-15H

4 g P123 was dissolved in the mixture of 30 mL H<sub>2</sub>O and 120 mL 2 M HCl solution. This homogeneous mixture was stirred for 2 h under room temperature. After stirring, 8.5 g TEOS was then added into the solution dropwise and stirred for 20 h. The resulting gel was transferred into a autoclave and heated at 120 °C overnight. The target SBA-15H was obtained by calcination of the precursor under stagnant air in a muffle oven at 500 °C for 12 h (heating ramp of 1 °C min<sup>-1</sup>).

## 2. Characterization

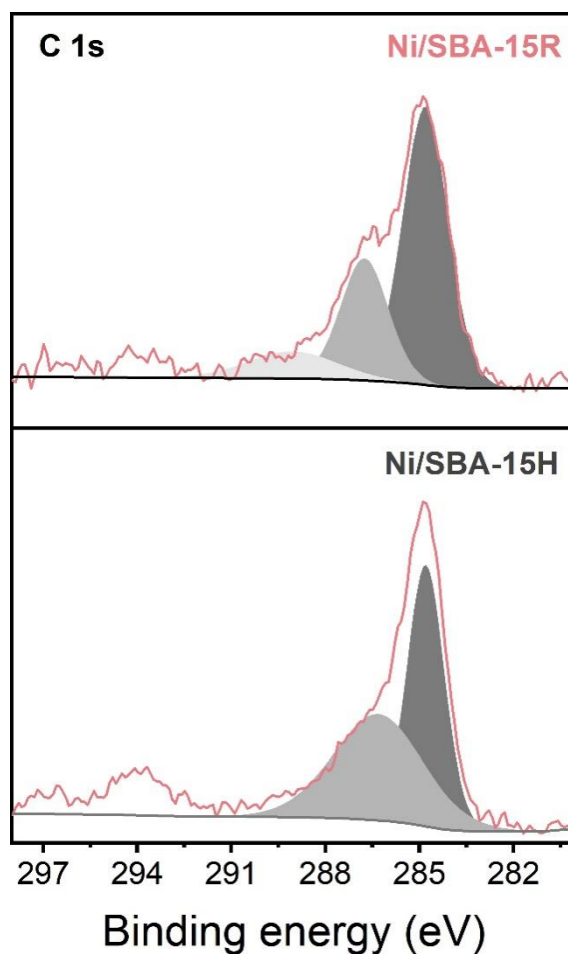

**Figure S1.** C 1s XPS profiles for Ni/SBA-15R and Ni/SBA-15H

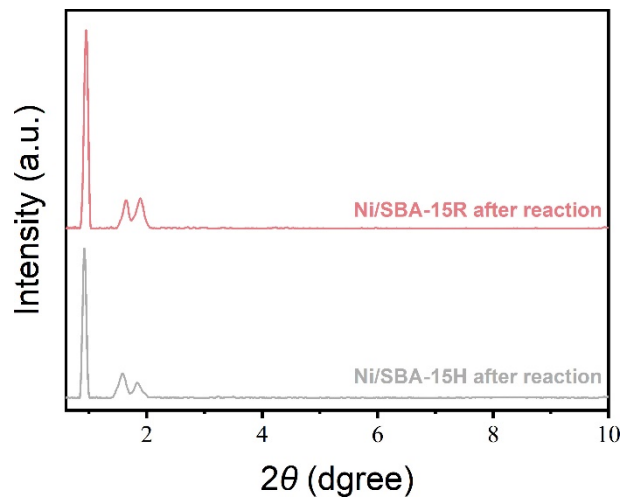

**Figure S2.** Low-angle XRD patterns for Ni/SBA-15R and Ni/SBA-15H after reaction.

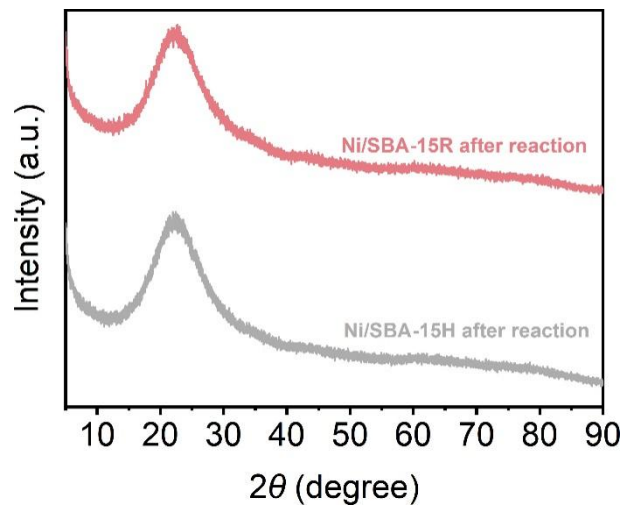

**Figure S3.** High-angle XRD patterns for Ni/SBA-15R and Ni/SBA-15H after reaction.

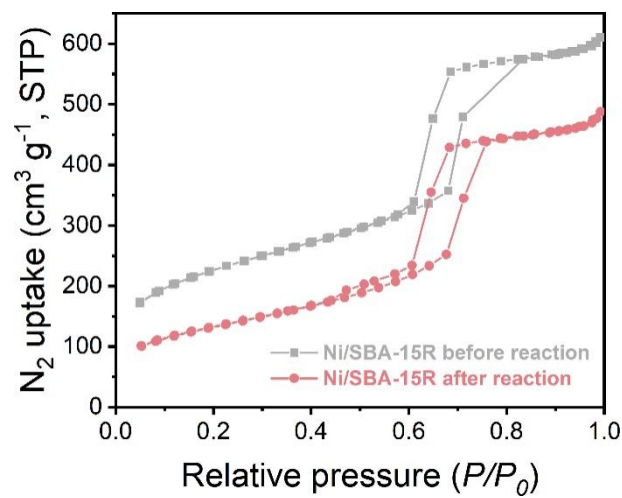

**Figure S4.** Comparison of N<sub>2</sub> sorption isotherm for Ni/SBA-15R before and after reaction.

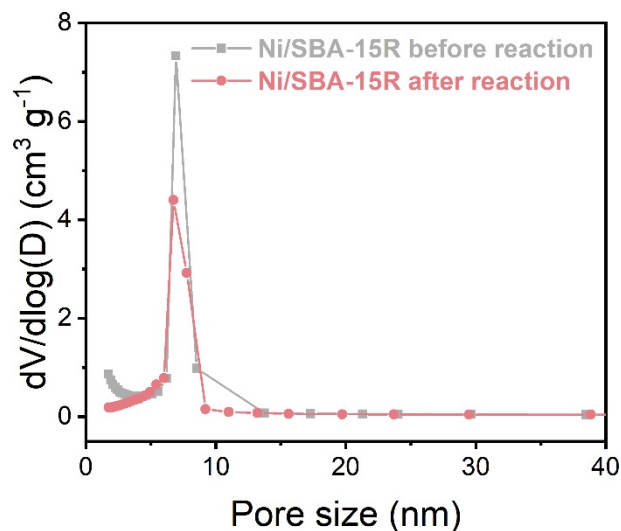

Figure S5. Comparison of pore size distribution for Ni/SBA-15R before and after reaction.

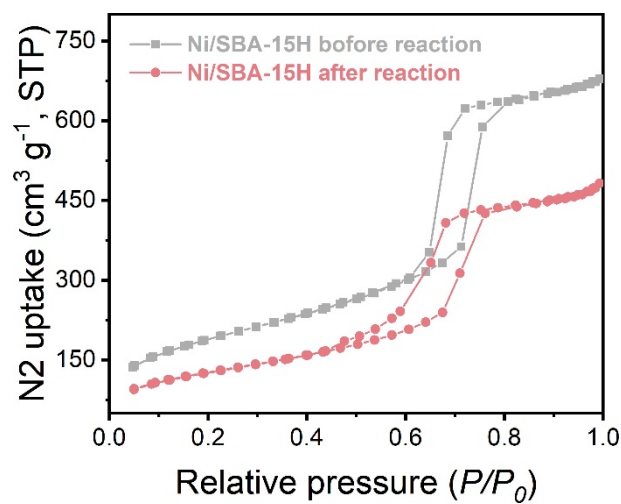

Figure S6. Comparison of N<sub>2</sub> sorption isotherm for Ni/SBA-15H before and after reaction.

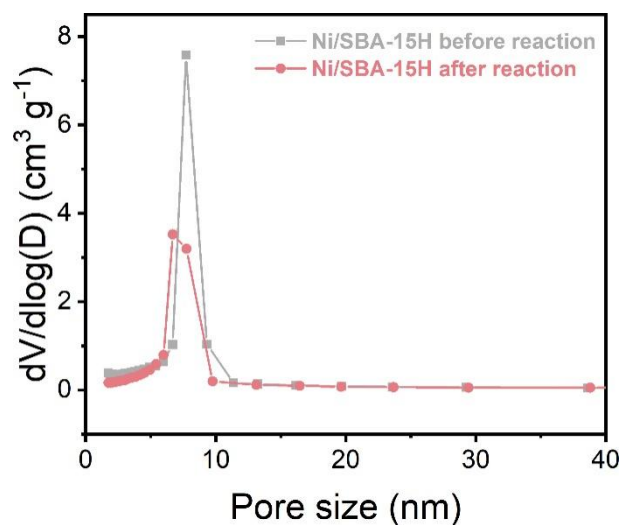

Figure S7. Comparison of pore size distribution for Ni/SBA-15H before and after reaction.

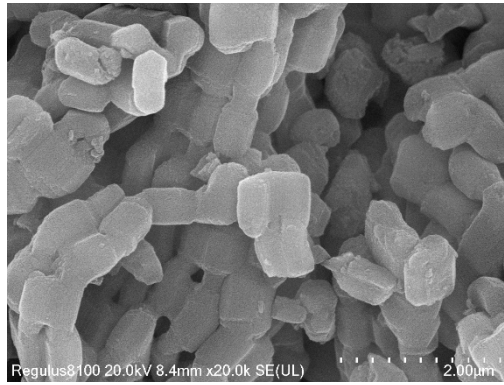

**Figure S8.** SEM images of Ni/SBA-15R after reaction.

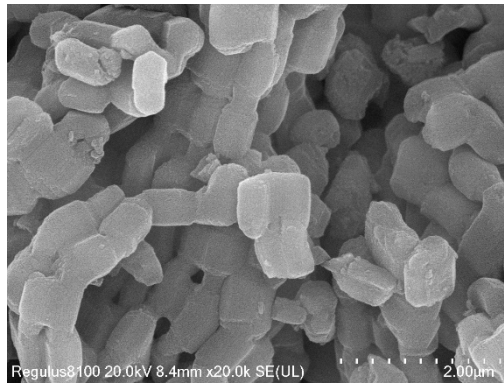

**Figure S9.** SEM images of Ni/SBA-15H after reaction.

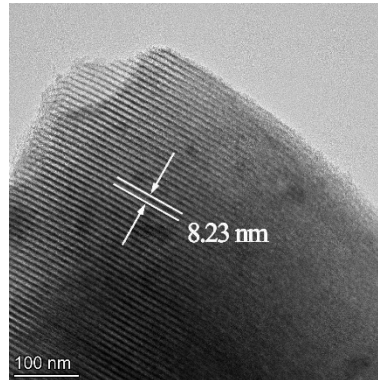

**Figure S10.** TEM images of Ni/SBA-15R after reaction.

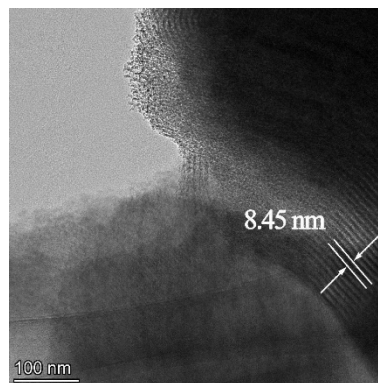

**Figure S11.** TEM images of Ni/SBA-15H after reaction.
